# Supplementary material for: Tissue damaging toxins in snake venoms: mechanisms of action, pathophysiology and treatment strategies
Source: Springer Nature journal article supplement (doi:10.1038/s42003-024-06019-6), 2024-03-22
Supplement: MOESM1 [file 42003_2024_6019_MOESM1_ESM.pdf]

**Supplementary Table 1.** Overview of the alternative names of several toxin classes with direct cytotoxic properties and a proposed name for the cytotoxic members of each protein family.

| Toxin class                   | Alternative names                 | Proposed name(s)                    |
|-------------------------------|-----------------------------------|-------------------------------------|
| Three-finger toxins (3FTxs)   | TFTs (three-finger toxins)        | Cytotoxic-3FTxs or neurotoxic 3FTxs |
|                               | TFPs (three-finger proteins)      |                                     |
|                               | Cytolysins                        |                                     |
|                               | Membrane toxins                   |                                     |
|                               | Membranotoxins                    |                                     |
|                               | Direct lytic factors              |                                     |
|                               | Cytotoxins                        |                                     |
| Cardiotoxins                  |                                   |                                     |
| PLA <sub>2</sub> s            | Myotoxins                         | Cytotoxic PLA <sub>2</sub> s        |
| $\beta$ -defensin-like toxins | Small basic myotoxins             | $\beta$ -defensin-like toxins       |
|                               | Small basic polypeptide myotoxins |                                     |

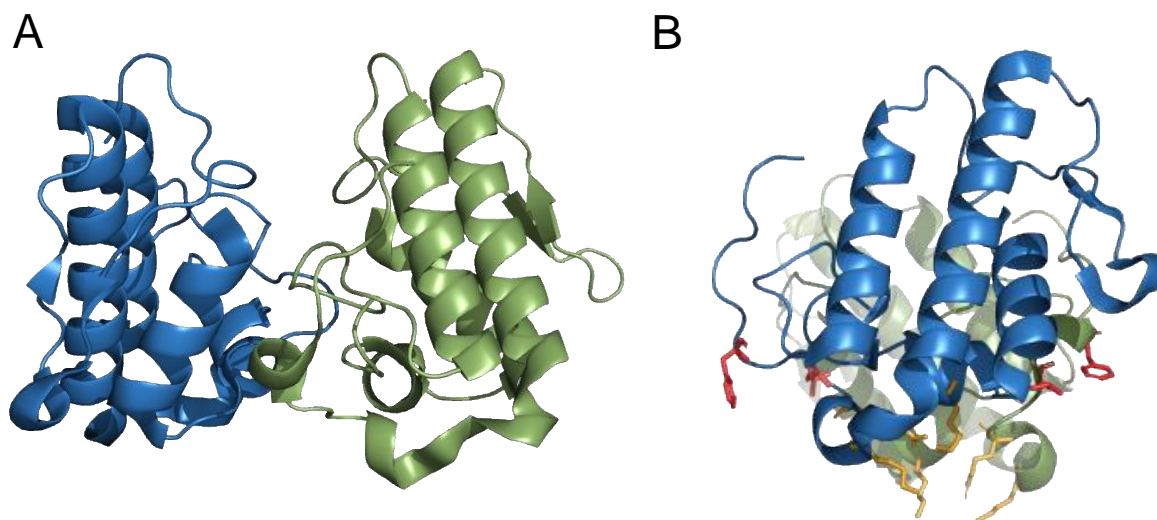

**Supplementary Figure 1. Structure of a Lys49-PLA<sub>2</sub>.** (A) Cartoon representation of the three-dimensional structure of the dimer of Lys49-PLA<sub>2</sub> BthTx1 from *Bothrops jararacusu* determined by X ray crystallography (PBD 3hzd, Fernandes *et al.*, 2010, reference 61). Each monomer is colored in blue or green. (B) The cationic membrane-docking site composed by K20, K115 and R118 are represented by orange sticks, while the hydrophobic membrane-

disruption site composed by L121 and F125 are represented by red sticks in both PLA<sub>2</sub> monomers as described by Fernandes *et al.*, 2014 (reference 60).
